# Supplementary material for: Global Optimal Estimation Retrievals of Atmospheric Carbonyl Sulfide Over Water from IASI Measurement Spectra for 2018
Source: Copernicus journal article supplement (doi:10.5194/egusphere-2025-1073), 2025-04-02
Supplement: Supplementary file 1 [file egusphere-2025-1073-supplement.pdf]

# Supplement

Michael Cartwright et al.

Correspondence to: Michael P. Cartwright (mpc24@leicester.ac.uk)

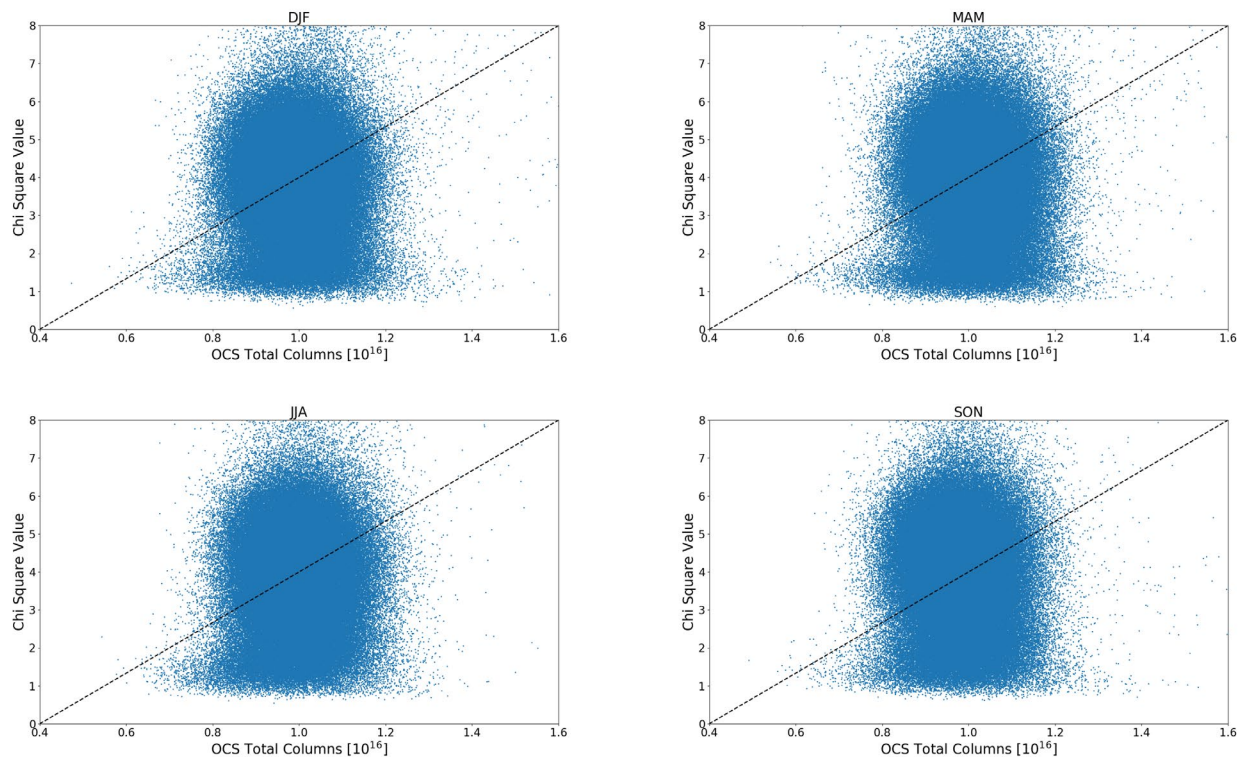

5 **Figure S1. Correlation between OCS total column amounts (molecules  $\text{cm}^{-2}$ ) and  $\chi^2$ . A random subset of 200,000 pixels is used from global OCS<sub>OCe-B</sub> 2018 data.**

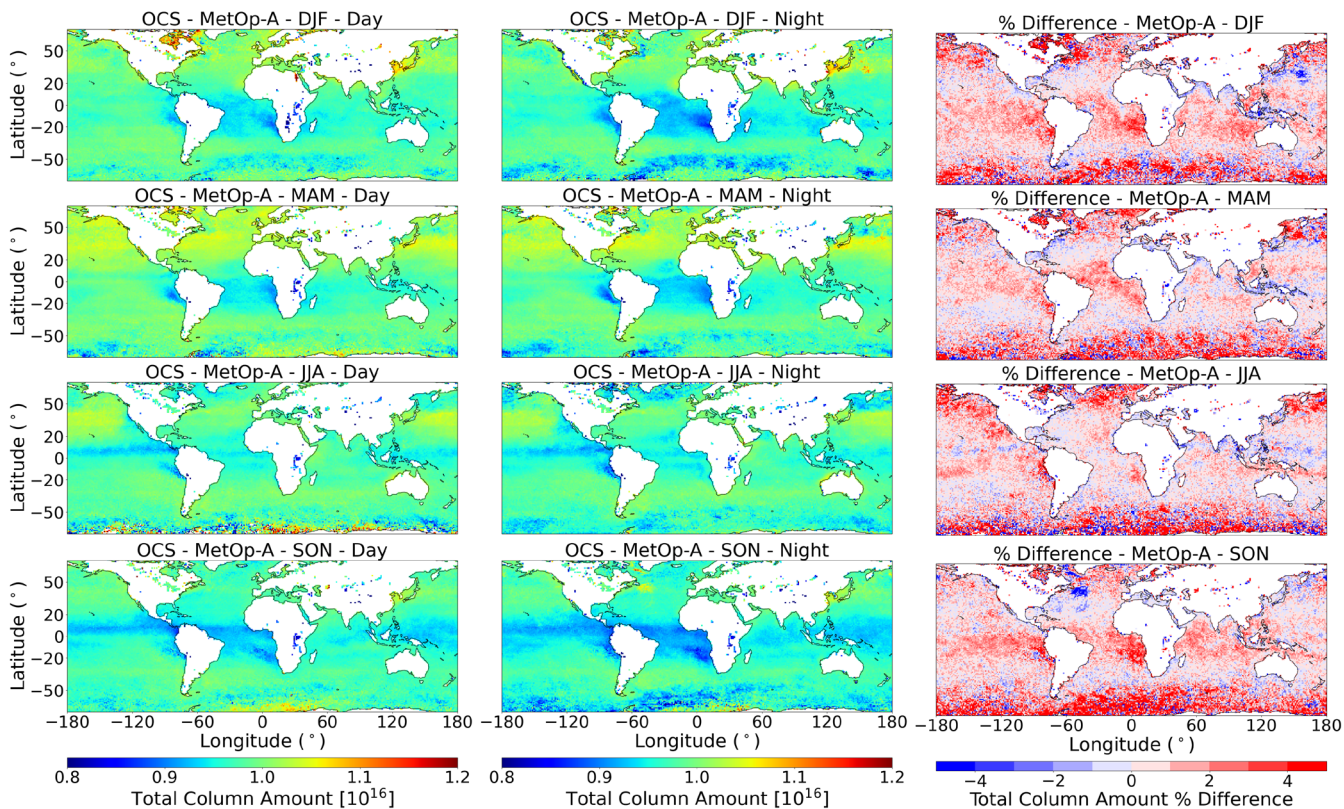

**Figure S2. Seasonal estimates of total column OCS mean values in units of molecules  $\text{cm}^{-2}$ , for 2018, in  $1^\circ \times 1^\circ$  bins. Using MetOp-A measurement spectra only. Left: OCS<sub>OCE-A</sub> daytime estimates, middle: OCS<sub>OCE-A</sub> nighttime estimates, right: the % difference between day and night.**



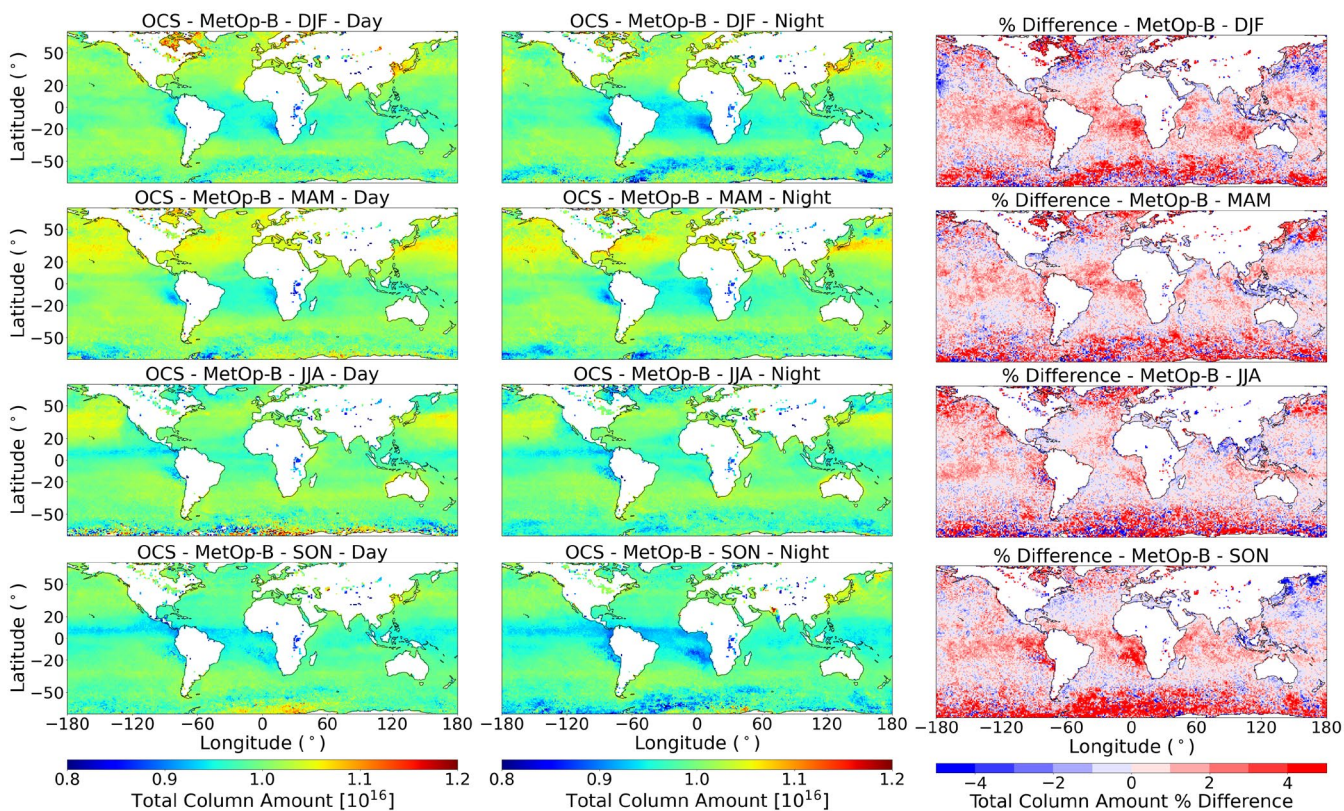

**Figure S3. Seasonal estimates of total column OCS mean values in units of molecules  $\text{cm}^{-2}$ , for 2018, in  $1^\circ \times 1^\circ$  bins. Using MetOp-B measurement spectra only. Left: OCS<sub>SOCE-B</sub> daytime estimates, middle: OCS<sub>SOCE-B</sub> nighttime estimates, right: the % difference between day and night.**

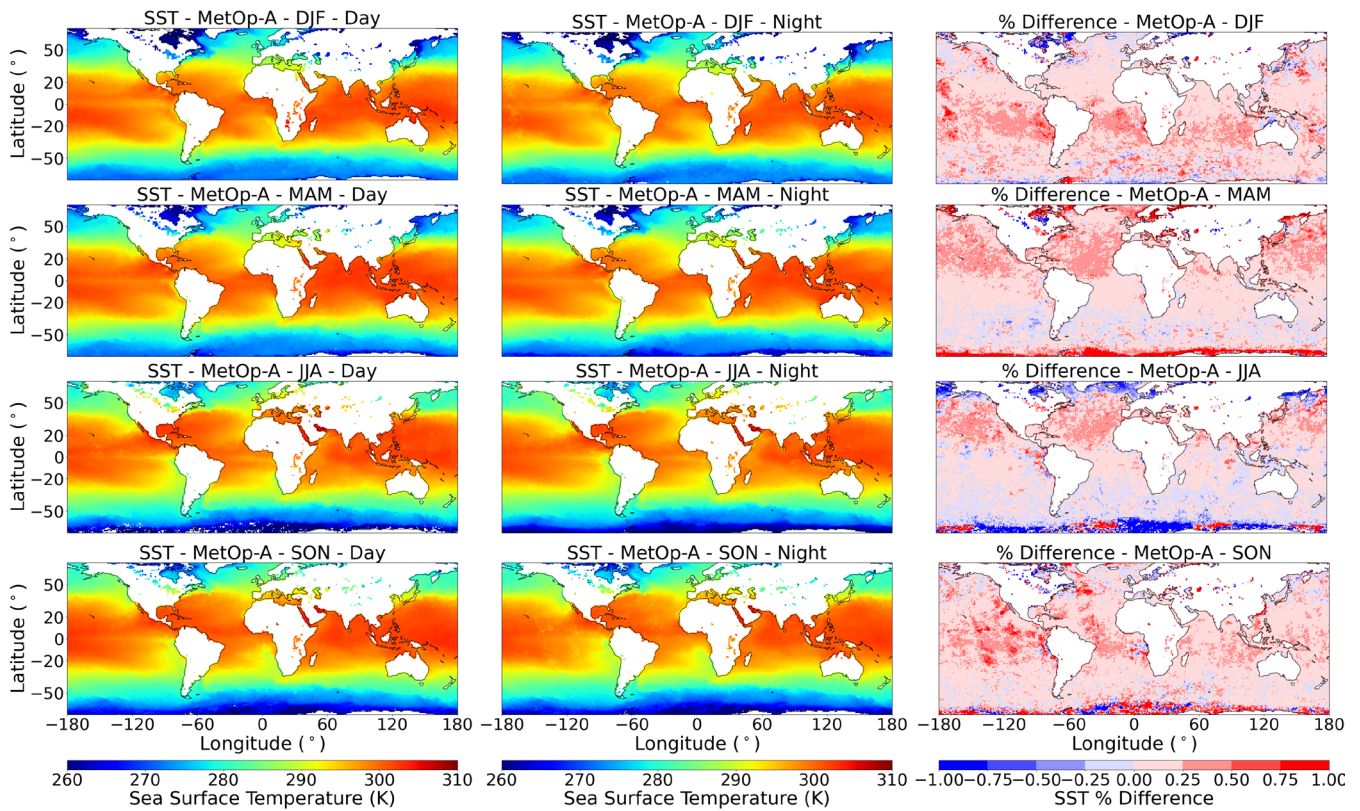

**Figure S4. Seasonal estimates of mean retrieved sea surface temperature (SST) values in units of K, for 2018, in  $1^\circ \times 1^\circ$  bins. Using MetOp-A measurement spectra only. Left: daytime estimates, middle: nighttime estimates, right: the % difference between day and night.**



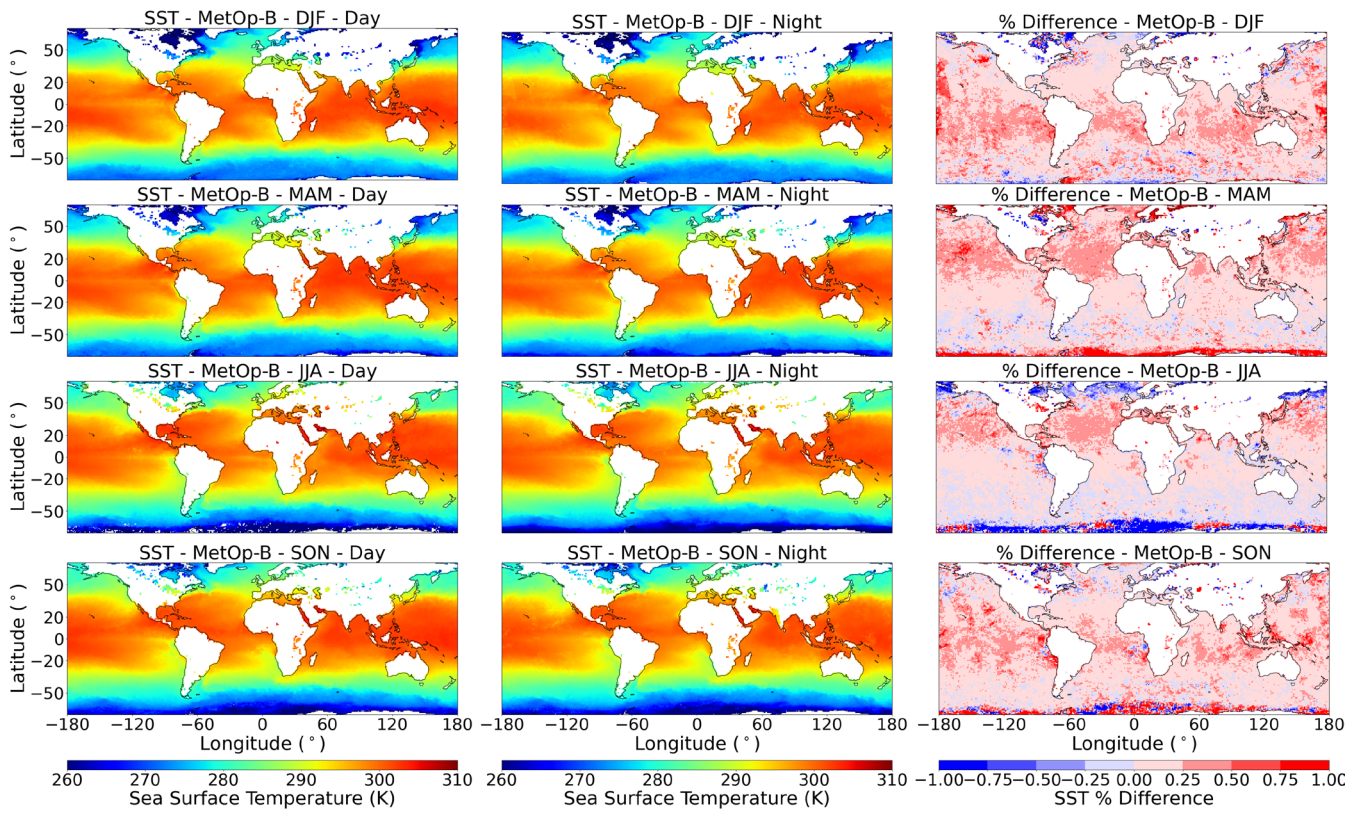

25 **Figure S5. Seasonal estimates of mean retrieved sea surface temperature (SST) values in units of K, for 2018, in  $1^\circ \times 1^\circ$  bins. Using MetOp-B measurement spectra only. Left: daytime estimates, middle: nighttime estimates, right: the % difference between day and night.**

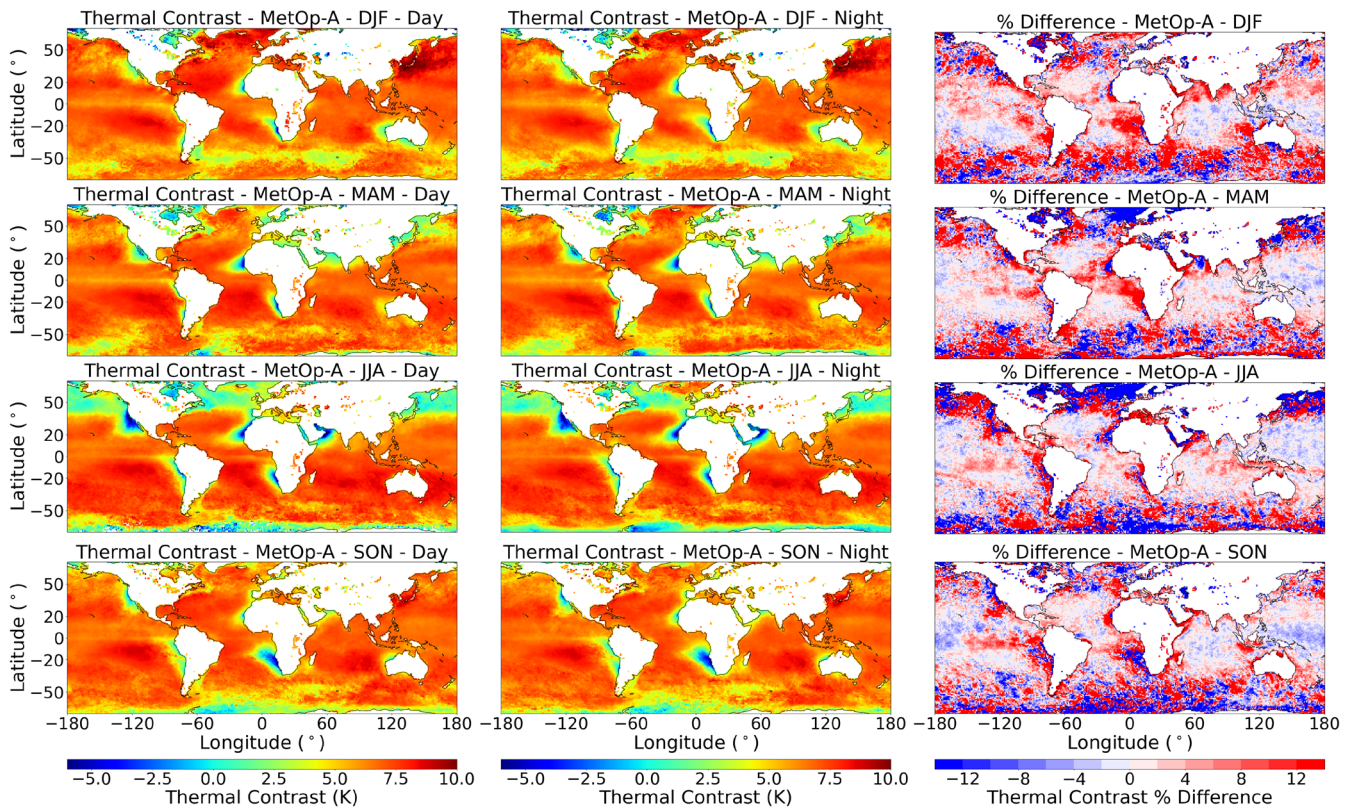

**Figure S6. Seasonal estimates of mean retrieved thermal contrast (surface temperature less the first atmospheric layer temperature) values in units of K, for 2018, in  $1^\circ \times 1^\circ$  bins. Using MetOp-A measurement spectra only. Left: daytime estimates, middle: nighttime estimates, right: the % difference between day and night.**

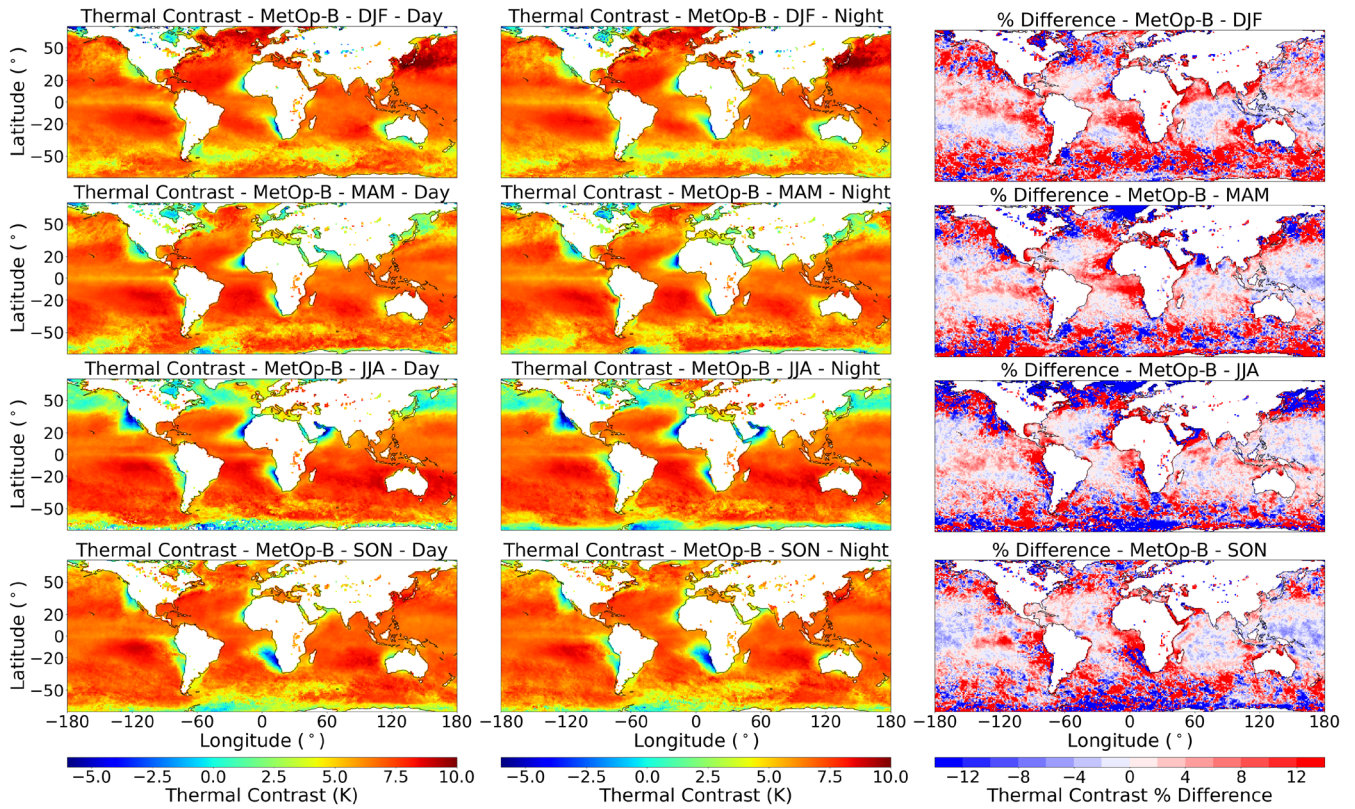

35 **Figure S7. Seasonal estimates of mean retrieved thermal contrast (surface temperature less the first atmospheric layer temperature) values in units of K, for 2018, in  $1^\circ \times 1^\circ$  bins. Using MetOp-B measurement spectra only. Left: daytime estimates, middle: nighttime estimates, right: the % difference between day and night.**



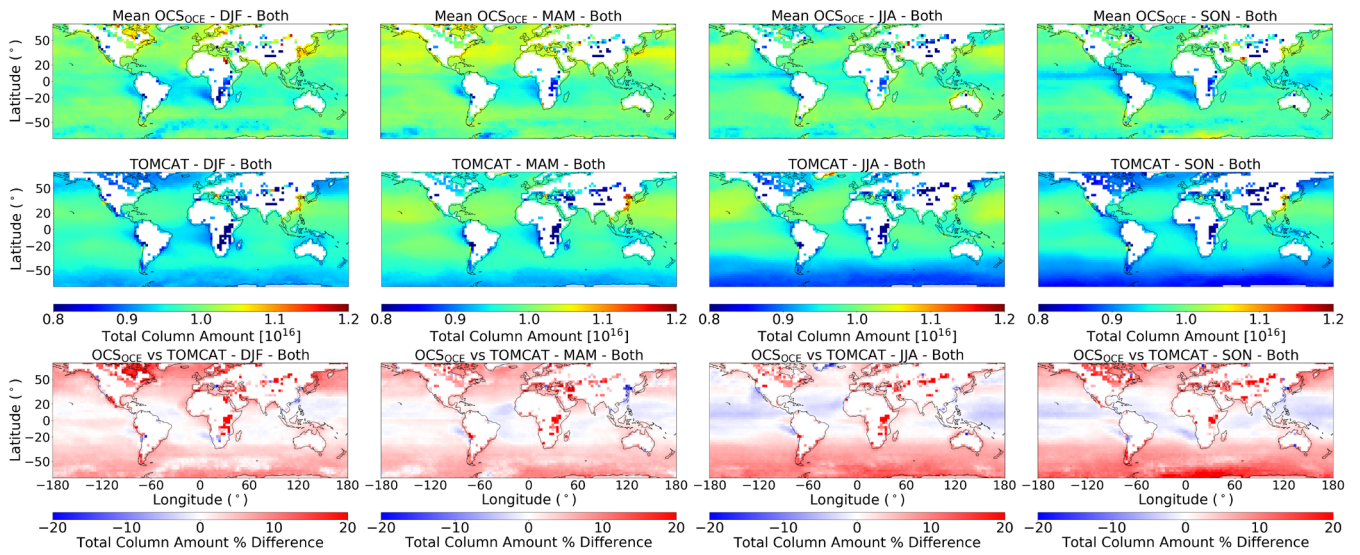

40 **Figure S8. 1st row: seasonal estimates of total column OCS<sub>SOCE</sub> mean values in units of molecules  $\text{cm}^{-2}$ , for 2018, in  $1^\circ \times 1^\circ$  bins. 2nd row: TOMCAT OCS without OCS<sub>SOCE</sub> AK applied and 3rd row: the % difference with OCS<sub>SOCE</sub>.**
